# Supplementary material for: Parkin Impairs Antiviral Immunity by Suppressing the Mitochondrial Reactive Oxygen Species-Nlrp3 Axis and Antiviral Inflammation
Source: PubMed Central journal article supplement (PMC6593176; doi:10.1016/j.isci.2019.06.008), 2019-06-11
Supplement: mmc1.pdf [file mmc1.pdf]

ISCI, Volume 16

## **Supplemental Information**

### **Parkin Impairs Antiviral Immunity by Suppressing the Mitochondrial Reactive Oxygen Species-Nlrp3 Axis and Antiviral Inflammation**

**Jian Li, Chunmei Ma, Fei Long, Dongxue Yang, Xue Liu, Yingchao Hu, Chunyan Wu, Bingwei Wang, Min Wang, Yunzi Chen, Genyan Liu, Paul N. Moynagh, Jiawei Zhou, Tao Peng, and Shuo Yang**

## Supplementary information

### Transparent methods

#### Mice

*Park2*<sup>-/-</sup> mice (Strain ID: 006582, C57BL/6 background) were provided by Dr. Jiawei Zhou from the Jackson Laboratory. *Nlrp3*<sup>-/-</sup> mice on C57BL/6 background were a gift from Dr. V. Dixit (Genentech). *Park2*<sup>-/-</sup> *Nlrp3*<sup>-/-</sup> mice were established by crossing *Nlrp3*<sup>-/-</sup> with *Park2*<sup>-/-</sup> mice. Mice used in this study (8-10-week-old male mice) were kept and bred under specific-pathogen-free conditions. All experiments were performed under protocols approved by the Institutional Animal Care and Use Committee of Nanjing Medical University, Guangzhou Medical University and Shanghai Institute of Neuroscience, Chinese Academy of Sciences.

#### Reagents

IL-18 ELISA capture antibody (D047-3), detection antibody (D048-6) and standard protein (12405-1) were from R&D; IFN- $\beta$  ELISA capture antibody (sc-57201) was from Santa Cruz; IFN- $\beta$  detection antibody (32400-1) and standard protein (12400-1) were from R&D. Anti-P62(5114), anti-LC3B(2775), anti-myc(2276), anti-phosphorylated IRF3(4947s), anti-IRF3(4302s), anti-TBK1(3013s), anti-phosphorylated TBK1(5483s), anti-phosphorylated I $\kappa$ B $\alpha$ (9246s) and anti-phosphorylated P38(9212s) were from Cell Signaling Technology; Anti-flag (F3165), anti- $\beta$ -actin(AC-15; A 1978) and anti- $\alpha$ -tubulin(T9026) were from Sigma; Anti-Parkin (sc-32282) and anti-Traf3(sc-949) were from Santa Cruz; Anti-IL-1  $\beta$  (AB-401-NA) was from R&D; Anti-caspase 1 (AG-20B-0042-C100) was from Adipogen. Anti-mouse-HRP and anti-rabbit-HRP were from Jackson ImmunoResearch. Anti-CD45-AF700(30-F11,85-11-0112-81), anti-CD11b-FITC(M1/70,85-12-0114-81), anti-CD11c-PE (N418, 48-9688-82), anti-Ly6C-PE-Cy7(HK1.4,25-5932-82), anti-Ly6G- eFlour450 (1A8-LY6G, 48-9668-82), anti-TCR $\beta$ -eFlour450(H57-597, 48-5961-80), anti-B220-Percp-Cy5.5 (Ra3-6B2,45-0452-82) and anti-NK1.1-PE-Cy7(PK136, 25-5941-81) antibodies were from eBioscience; MHC II (M5/114.15.2, 107627.0) was from Biolegend. Pam3CSK4 (tlrl-pms) and Poly(I:C) (tlrl-picw) were from Invivogen. Mito-Q was from MCE(HY-100116). Ficoll was from GE Health (45-001-749).

#### Viruses

VSV (Indiana strain) and HSV-1 (KOS strain) were obtained from Dr. Yichuan Xiao (Shanghai Institutes for Biological Sciences, China). VSV-GFP and HSV-1-GFP were from Dr. Tao Peng. All viruses were amplified by infection of a monolayer of African green monkey kidney cells (Vero). Briefly, 24-48 h after infection, the infected cells were frozen and thawed for three times to release virus. Then the cell lysate and culture supernatant were harvested and clarified by centrifugation. Viral titers were determined by standard plaque assay on confluent monolayers of Vero cells.

#### Viral infection in vivo

Age matched male mice (8-10-week old) were intranasally infected with VSV at  $2 \times 10^8$  pfu per mouse or intravenously infected with HSV-1 at  $6 \times 10^7$  pfu per mouse. Lungs from inoculated animals were homogenized in PBS and assayed for viral loads by plaque assay on Vero cells. Serum, BALF and lungs were also collected for Elisa, histology and FACS analysis.

### **Plaque Assay for Virus Titers**

Viral infectivity was quantified using Vero cell monolayer. In brief, several 10-fold serial dilutions of the samples were made, added to Vero cell monolayer and incubated for 1–2 days. Then the cells were fixed and stained with 0.1% crystal violet solution for 10 min. Plaques were counted and viral titers were determined as plaque-forming units per ml by multiplying the dilution factor. For assay of viral load in mouse organs, after mice were sacrificed organs were collected individually, disrupted with a tissue homogenizer, frozen, and thawed three times to release the virus. Serial dilutions were made of the organ homogenates and then subjected to plaque assay.

### **Cell preparation and stimulation**

MEFs were generated from E12-14 embryos, maintained in DMEM supplemented with 10% FBS, and sub-cultured no more than five passages before experiments. For isolation of BMDMs and BMDCs, tibias and femurs were removed from mice by sterile techniques and bone marrow was flushed with fresh medium. BMDMs were cultured in DMEM supplemented with 10% FBS in the presence of 10% L929 conditioned medium. BMDCs were cultured in RPMI-1640 complemented with 10% FBS in the presence of 10% J558 culture medium. After 5 days culture,  $1.5 \times 10^6$  BMDMs and BMDCs were plated overnight in 12-well plates and were infected with VSV and HSV-1 as indicated in legends. For inducing inflammasome activation, BMDMs were primed with  $1 \mu\text{g}/\text{mL}$  Pam3CSK4 for 3 h and then stimulated with ATP (2.5 mM) for 1 hour or with VSV and HSV-1 as indicated MOI for 24 h. THP-1 cells were cultured in RPMI-1640 medium plus GlutaMAX-I medium (Gibco) and transfected with control or Parkin-specific siRNA for 48hr. The following siRNA sequences were used: Con-siRNAs UUCUCCGAACGUGUCACGUTT, Con-siRNAs ACGUGACACGUUCGGAGAATT; Park2-siRNAs CGACCCUCAACUUGGCUACTT, Park2-siRNAs GUAGCCAAGUUGAGGGUCGTT. The knockdown cells were then infected with VSV and HSV-1 for indicated times.

### **Immunoblotting**

Cells were grown in 12-well plates and after treatment were then collected in  $120 \mu\text{l}$  NP-40 lysis buffer (50 mM Tris-HCl, pH 7.4, containing 150 mM NaCl, 1% (vol/vol) Igepal, 10% (wt/vol) glycerol, 50 mM NaF, 1 mM  $\text{Na}_3\text{VO}_4$ , 1 mM dithiothreitol, 1 mM phenylmethylsulphonyl fluoride and complete protease-inhibitor 'cocktail' (Sigma)), followed by incubation for 30 min at  $4^\circ\text{C}$ . Cell lysates were initially precleared by centrifugation at 14000 rpm. An aliquot of 6X SDS-PAGE sample buffer (1M Tris-HCl, pH 6.8, 20% (w/v) glycerol, 4% (w/v) SDS, 3% (w/v) DTT and 0.02% (w/v) bromophenol blue) was added to cell lysates. Samples were resolved by SDS-PAGE, transferred to nitrocellulose membranes and analyzed by immunoblot with the appropriate antibodies. Immunoreactivity was visualized by the Odyssey Imaging System (LI-COR Biosciences) or enhanced chemiluminescence.

### **Measurement of cytosolic mtDNA**

WT and *Parkin*<sup>-/-</sup> MEFs were infected with VSV and HSV-1 (MOI=10) for 4h. Total DNA was isolated from the indicated cells using E.Z.N.A.<sup>TM</sup> MicroElute Genomic DNA kit (OMEGA) according to manufacturer's instructions. mtDNA was quantified by qPCR using primers specific for the mitochondrial D-loop region or a specific region of mtDNA that is not inserted into nuclear DNA (non-NUMT). Nuclear DNA encoding Tert and B2m was used for normalization.

D-loop F: 5'AATCTACCATCCTCCGTGAAACC3';  
D-loop R: 5'TCAGTTTAGCTACCCCAAGTTTAA3'  
Tert F: 5'CTAGCTCATGTGTCAAGACCCTCTT3'  
Tert R: 5'GCCAGCACGTTTCTCTCGTT3'  
B2m F: 5'ATGGGAAGCCGAACATACTG3'  
B2m R: 5'CAGTCTCAGTGGGGGTGAAT3'  
non-NUMT F: 5'CTAGAAACCCCGAAACCAA3'  
non-NUMT R: 5'CCAGCTATCACCAAGCTCGT3'

### Measurement of cytosolic 8OH-dG

WT and *Park2*<sup>-/-</sup> BMDMs were primed with 1µg/mL Pam3CSK4 for 3 hr and then stimulated with VSV and HSV-1(MOI=10) for 5h. Cellular fractionation was then performed using a mitochondrial isolation kit for cultured cells according to manufacturer's instructions. Cytosolic protein concentration and volume of the supernatant were normalized, DNA was isolated from 300ul cytosolic fractions using E.Z.N.A.<sup>TM</sup> MicroElute Genomic DNA kit according to manufacturer's instructions. The 8OH-dG was quantified using 8OH-dG ELISA kit (Elabscience), as the manufacturer's instruction.

### RT-qPCR assays

Total RNA was extracted with Trizol reagent (Invitrogen) and reversed-transcribed with Reverse Transcription System (Vazyme). Reverse transcription products of different samples were amplified by Steponeplus (Applied Biosystems) using Brilliant SYBR Green QPCR Master mix (Vazyme) according to the manufacturer's instructions and data were normalized by the level of HPRT expression in each individual sample. 2<sup>-ΔΔCt</sup> method was used to calculate relative expression changes. Heatmap analysis was carried out using MeV Experiment View software. The following primers were used:

|                    |                               |                             |
|--------------------|-------------------------------|-----------------------------|
| Mouse <i>Il1b</i>  | S                             | As                          |
|                    | 5 ATGCCACCTTTTGACAGTGATG 3    | 5 GTTGATGTGCTGCTGCGAGA 3    |
| Mouse <i>Il6</i>   | S                             | As                          |
|                    | 5 CTTGGGACTGATGCTGGTGAC 3     | 5 GCCATTGCACAACCTCTTTTCTC 3 |
| Mouse <i>Il18</i>  | S                             | As                          |
|                    | 5 TCAAAGTGCCAGTGAACCCC 3      | 5 AGGGTCACAGCCAGTCCTCTT 3   |
| Mouse <i>Il12</i>  | S                             | As                          |
|                    | 5 TGGTTTGCCATCGTTTTGC 3       | 5 GGGAGTCCAGTCCACCTCTACA 3  |
| Mouse <i>Irf7</i>  | S                             | As                          |
|                    | 5 CAGCACAGGGCGTTTTATCTT 3     | 5 TCTTCCCTATTTCCGTGGC 3     |
| Mouse <i>Isg15</i> | S                             | As                          |
|                    | 5 AGCAGATTGCCAGAAGATTG 3      | 5 CCCCTTTCGTTCCCTCACCA 3    |
| Mouse <i>Ifna</i>  | S                             | As                          |
|                    | 5 CTTTCCTCATGATCCTGGTAATGAT 3 | 5 AATCCAAAATCCTTCTGTCTTC    |
|                    |                               | 3                           |
| Mouse <i>Ifnb</i>  | S                             | AS                          |
|                    | 5 CCCTATGGAGATGACGGAGA 3      | 5 CCCAGTGCTGGAGAAATTGT 3    |

|                      |                               |                            |
|----------------------|-------------------------------|----------------------------|
| Mouse <i>Ndufa6</i>  | S                             | AS                         |
|                      | 5ACGGCAGCGAGTCCCGTGGCACCGC3   | 5 GTGTCCGCTGCTTCCATACTT 3  |
| Mouse <i>Ndufab1</i> | S                             | AS                         |
|                      | 5TGGGTTGGCGTAGCCATGGCGTCTC 3  | 5 TCGGTCCTTGATTCCGTCTAAC 3 |
| Mouse <i>Hprt</i>    | S                             | AS                         |
|                      | 5 GTCCCAGCGTCGTGATTAGC 3      | 5 TGGCCTCCCATCTCCTTCA 3    |
| Mouse <i>Ddx58</i>   | S                             | AS                         |
|                      | 5 CACATTTGCGGAAATACAACG 3     | 5 TGCTGCTTCTCGGACATCG 3    |
| Mouses <i>Isg15</i>  | S                             | AS                         |
|                      | 5 AGCAGATTGCCAGAAGATTG 3      | 5 CCCCTTTCGTTCCCTCACCA 3   |
| Mouse <i>Stat1</i>   | S                             | AS                         |
|                      | 5 TCACAGTGGTTCGAGCTTCAG 3     | 5 GCAAACGAGACATCATAGGCA 3  |
| Human <i>Park2</i>   | S                             | AS                         |
|                      | 5 ATGATAGTGTGGTTCAGGTTCAACT 3 | 5 CCCTGTCGCTTAGCAACCA 3    |
| Human <i>Pink1</i>   | S                             | AS                         |
|                      | 5ATGGCGGTGCGACAGGCGCTGGGCC3   | 5 CGGCTTGCTTTTCTGGGTAA 3   |
| Human <i>Hprt</i>    | S                             | AS                         |
|                      | 5 GGCGATGTCAATAGGACTCCAGAT 3  | 5 GGTGAAAAGACCCACGAA3      |

## ELISA

Primary mouse cells were stimulated as indicated. Conditioned media were collected and measured for levels of IL-1 $\beta$  (DY401), TNF- $\alpha$  (DY410) and IL-12 (DY2398) according to manufacturer's instructions (R&D Systems). The level of IL-18 and IFN- $\beta$  was assayed by an in-house sandwich ELISA system. The serum, BALF and lung from wild-type and *Park2*<sup>-/-</sup> mice were collected after infection as indicated and the levels of IL-1 $\beta$ , IL-18, IL-6(DY406), CXCL1 (DY453) and CCL2 (DY479) in these samples were measured by sandwich ELISA (R&D Systems). Conditioned supernatants from human THP-1 siRNA-transfected cells were assayed for IL-1 $\beta$  (DY201, R&D), IL-6 (DY206, R&D), IL-18(70-EK1181, Multi Sciences) and IFN- $\beta$  (70-EK1236-48, Multi Sciences).

## Cytotoxicity Assay (LDH)

Conditioned medium from treated BMDMs was assessed for LDH release using Pierce LDH Cytotoxicity Assay Kit (Promega) according to the manufacturer's instructions. Relative LDH release was calculated as LDH release [%] = 100 \* (measurement – unstimulated control)/ (lysis control – unstimulated control).

## Fluorescence and Confocal microscopy

BMDMs were seeded on slides overnight and then were stimulated as indicated. After being stained with TMRM (20 nM) in the dark for 30 minutes at 37 °C, the cells were fixed, washed three times with PBS and then followed by Hoechst for 5 min. Images were captured using Nikon50i fluorescent microscope.

### **Flow cytometry**

For isolation of lung infiltrating immune cells, mice on day 3 after viral infection were anesthetized and perfused with 10-15 mL of PBS (ice cold) through the right ventricle until lungs cleared of blood. Lungs were harvested, cut into small pieces and incubated in collagenase type IV (0.5mg/ml) and DNase I (10U/ml) at 37°C under agitation (200 rpm) conditions for 90 min. The digested tissues were filtered through a 100 µm filter and the plunger end of syringe was used to push the cells over the filter. Homogeneous cell suspensions were centrifuged over a 40%/80% discontinuous Percoll gradient (GE Healthcare), mononuclear cells were isolated from the interface. The cells were suspended in PBS containing 2% (w/v) FBS. Once lysed in RBC lysis buffer, cells were washed with the suspension buffer and stained with fluorochrome-conjugated surface marker antibodies for FACS analysis. The following antibodies were used: CD45, CD11b, ly6C, ly6G, MHC II<sup>+</sup>, CD11c, TCRβ, B220 and NK1.1. Mitochondria-associated ROS levels were measured by staining cells with MitoSOX (Invitrogen) at 2.5 µM for 30 min at 37 °C. Cells were then washed with PBS solution and re-suspended in cold PBS solution containing 1% FBS for FACS analysis. All flow cytometry was performed on an Attune NxT flow cytometer (ThermoFisher) and data were analyzed by FlowJo 7.6.1 software.

### **Histology and Immunohistochemistry**

Lungs from control or virus-infected mice were fixed in 10% phosphate-buffered formalin, embedded into paraffin and sectioned. Sections of lung 5 µm in thickness were collected on superfrost slides, deparaffinized in xylol and rehydrated, and stained with hematoxylin-eosin (H&E) solution y. For immunohistochemical staining, sections were blocked and incubated with primary antibodies and horseradish peroxidase-conjugated secondary antibodies after heat induced antigen retrieval. Diaminobenzidine was used for detection. Images were captured with Nikon 50i microscope.

### **Analysis of PBMC samples from patients with viral infection**

Individuals diagnosed with HCV infection and healthy volunteers were enrolled in this study. Clinical parameters and characterization of these patients were determined by a physician (GY. Liu). Blood samples were collected during severe illness. PBMCs were isolated by Ficoll-density gradient centrifugation (GE Healthcare). Total RNA was extracted with Trizol reagent (Invitrogen) and reversed-transcribed with Reverse Transcription System (Vazyme). This study was approved by the institution review board at the First Affiliated Hospital of Nanjing Medical University. All patient managements and blood sample collection were carried out in accordance with the relevant guidelines. The following table was information of human subjects.

| Name  | State | The sex | Age |
|-------|-------|---------|-----|
| Hu    | HCV   | female  | 32  |
| Jiang | HCV   | female  | 41  |
| Lu    | HCV   | female  | 27  |
| Han   | HCV   | female  | 28  |
| Su    | HCV   | female  | 37  |
| Sun   | HCV   | female  | 26  |

|       |         |        |    |
|-------|---------|--------|----|
| Wang  | HCV     | female | 49 |
| Lv    | HCV     | female | 33 |
| Liu   | Healthy | female | 24 |
| Wu    | Healthy | female | 26 |
| Hu    | Healthy | male   | 25 |
| Zhang | Healthy | male   | 26 |
| Rao   | Healthy | male   | 27 |
| Long  | Healthy | male   | 26 |
| Yang  | Healthy | male   | 23 |
| Wang  | Healthy | male   | 26 |

### **Statistical Analysis**

Data are presented as the mean  $\pm$  standard error of the mean (SEM). Samples were analyzed using unpaired t-test for two groups and ANOVA for multiple groups. Survival curves were generated via the product-limit method of GraphPad. In all cases, a P value of less than 0.05 was considered statistically significant.

# Figure S1

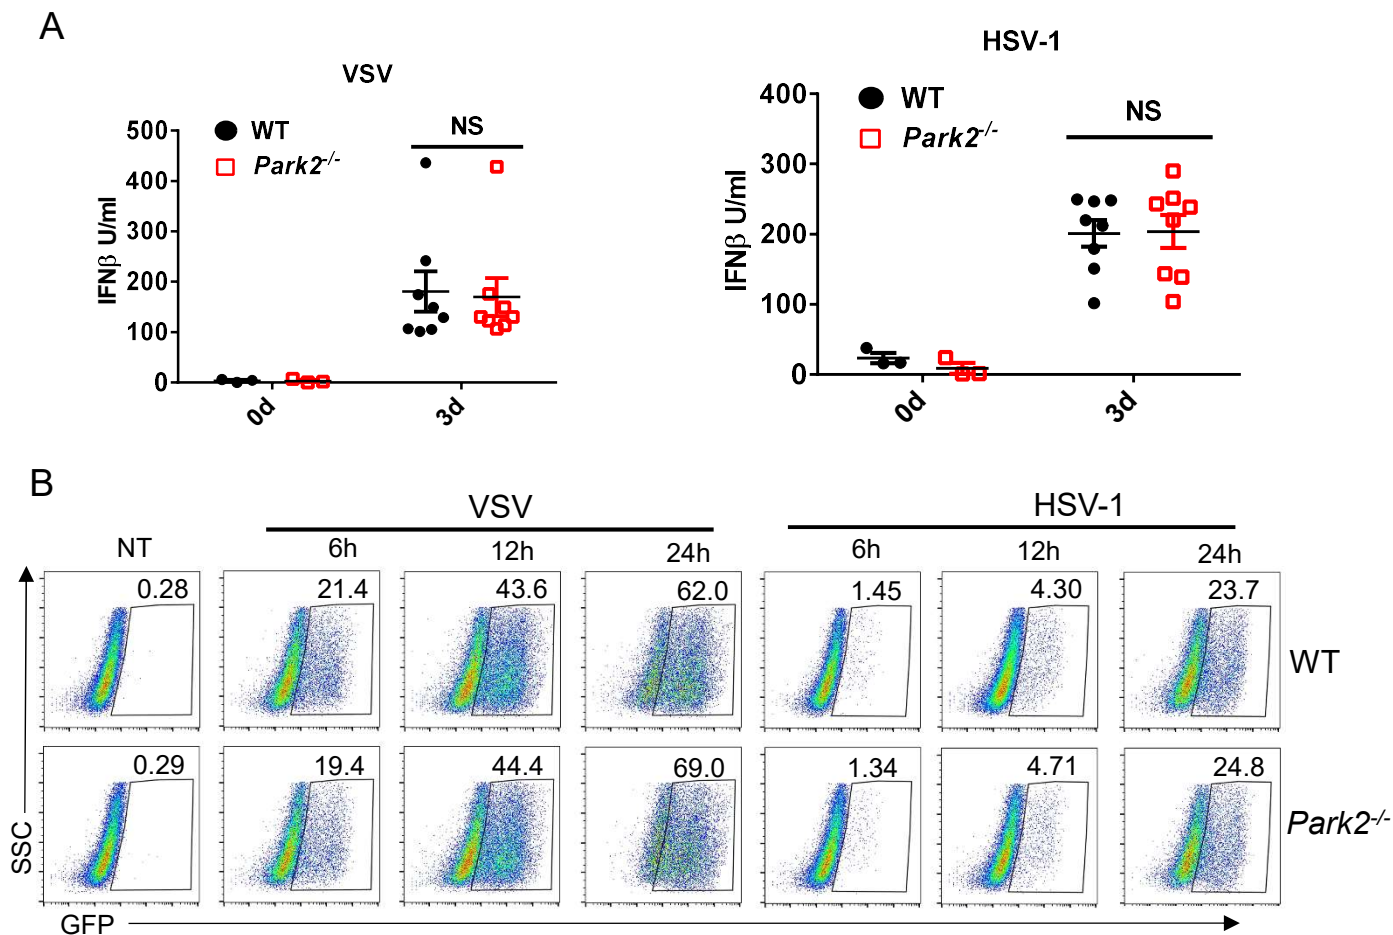

**Figure S1. Loss of Parkin doesn't affect IFN production in viral-infected mice, susceptibility of MEFs to VSV or HSV-1 infection, Related to Figure 1.**

(A) ELISA analysis of IFN- $\beta$  of lung homogenates from WT and *Park2*<sup>-/-</sup> mice infected with the indicated viruses for 3 days (n=8 for viral infection, n=3 for mock infection).

(B) Flow cytometry analysis of GFP expression in WT and *Park2*<sup>-/-</sup> MEFs infected with VSV-GFP and HSV-1-GFP at MOI 1 for 6,12 and 24 h. NT, No treatment



Figure S2

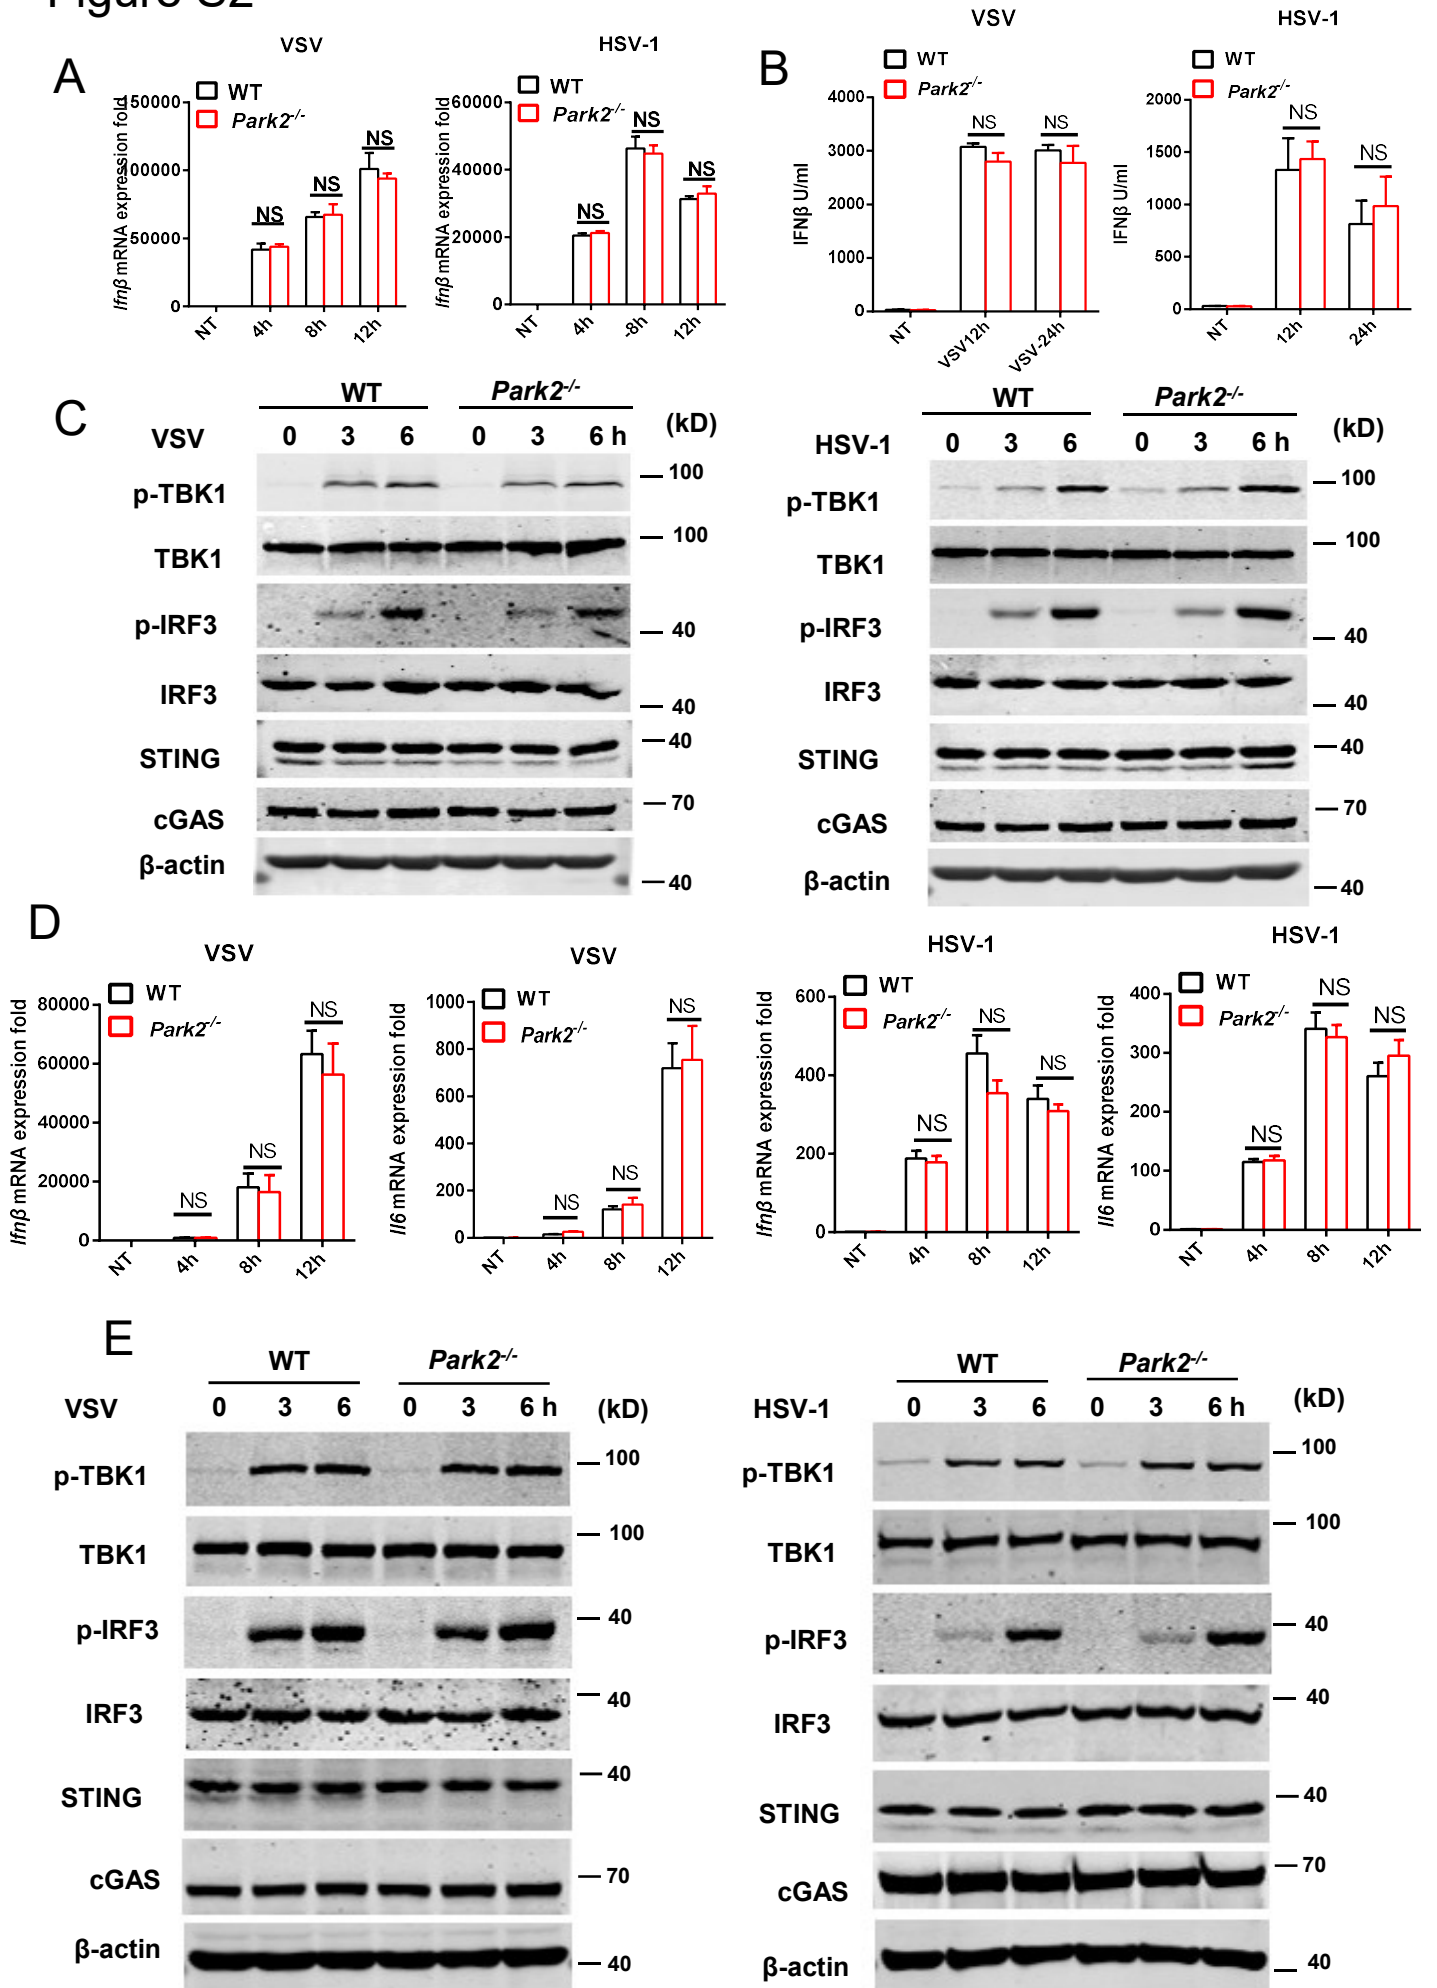

**Figure S2. Parkin deficiency doesn't affect antiviral signaling and IFN production in BMDCs and BMDMs, Related to Figure 1.**

(A) RT-qPCR analysis of *Ifnb* mRNA of WT and *Park2*<sup>-/-</sup> BMDCs infected with VSV or HSV-1 for 4, 8 and 12h. NT, No treatment

(B) ELISA of IFN- $\beta$  in the supernatants of WT and *Park2*<sup>-/-</sup> BMDCs infected with VSV or HSV-1 for 12 and 24h. NT, No treatment

(C) Immunoblot analysis of phosphorylated (p-) and total IRF3, STING and cGAS in WT and *Park2*<sup>-/-</sup> BMDCs infected for 0, 3 or 6h with VSV or HSV-1.

(D) RT-qPCR analysis of *Ifnb* and *Il6* mRNA of WT and *Park2*<sup>-/-</sup> BMDMs infected with VSV or HSV-1 for 4, 8 and 12h. NT, No treatment

(E) Immunoblot analysis of phosphorylated (p-) and total IRF3, STING, cGAS and  $\beta$ -actin (loading control) in WT and *Park2*<sup>-/-</sup> BMDMs infected for 0, 3 or 6h with VSV or HSV-1.

Data are pooled from three independent experiments (A, B and D) or are representative of two independent experiments (C and E). Error bars show means  $\pm$  SEM. NS, not significant. two-way ANOVA with Sidak's multiple comparisons test.

Figure S3

A

VSV

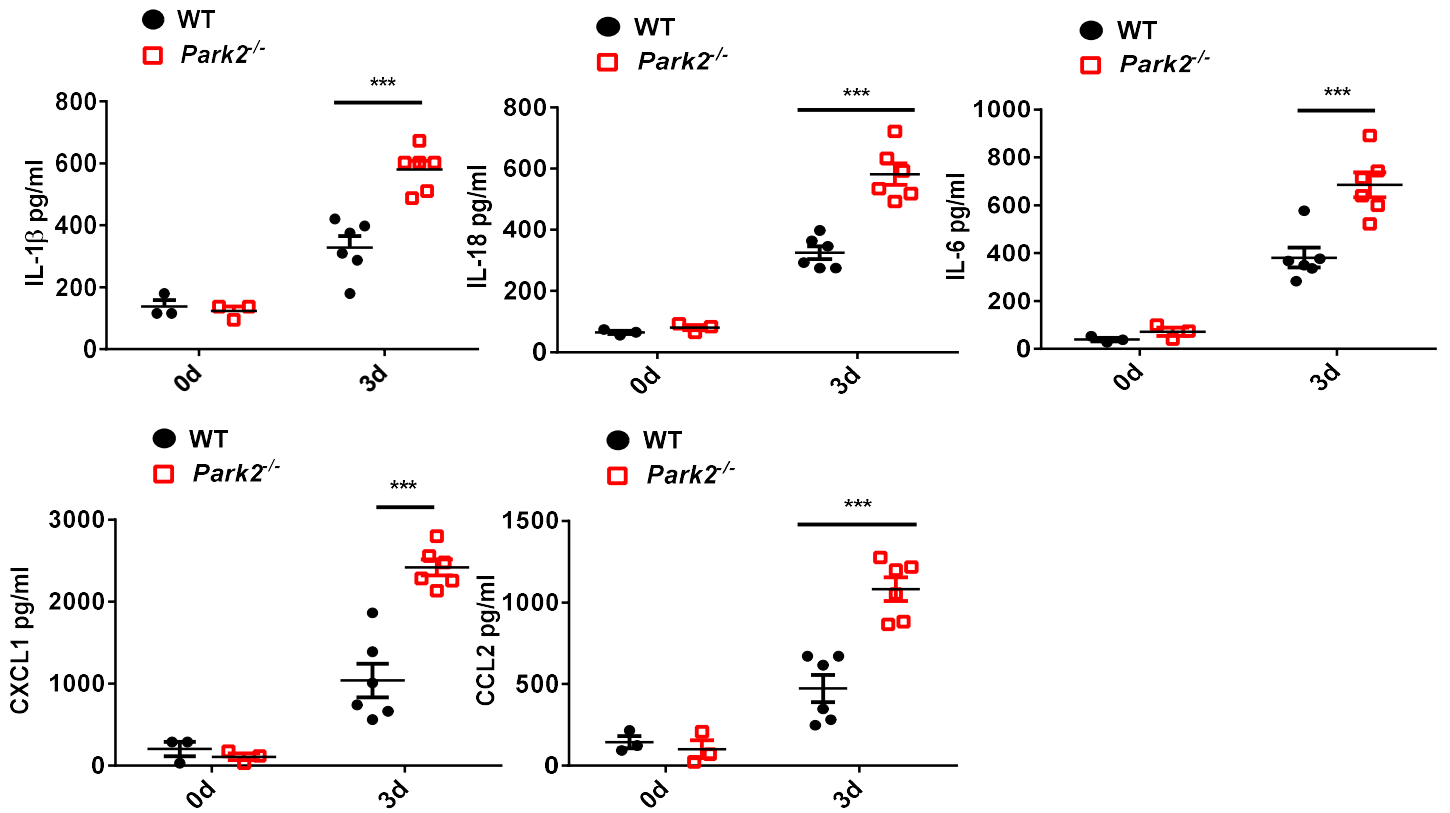

B

HSV-1

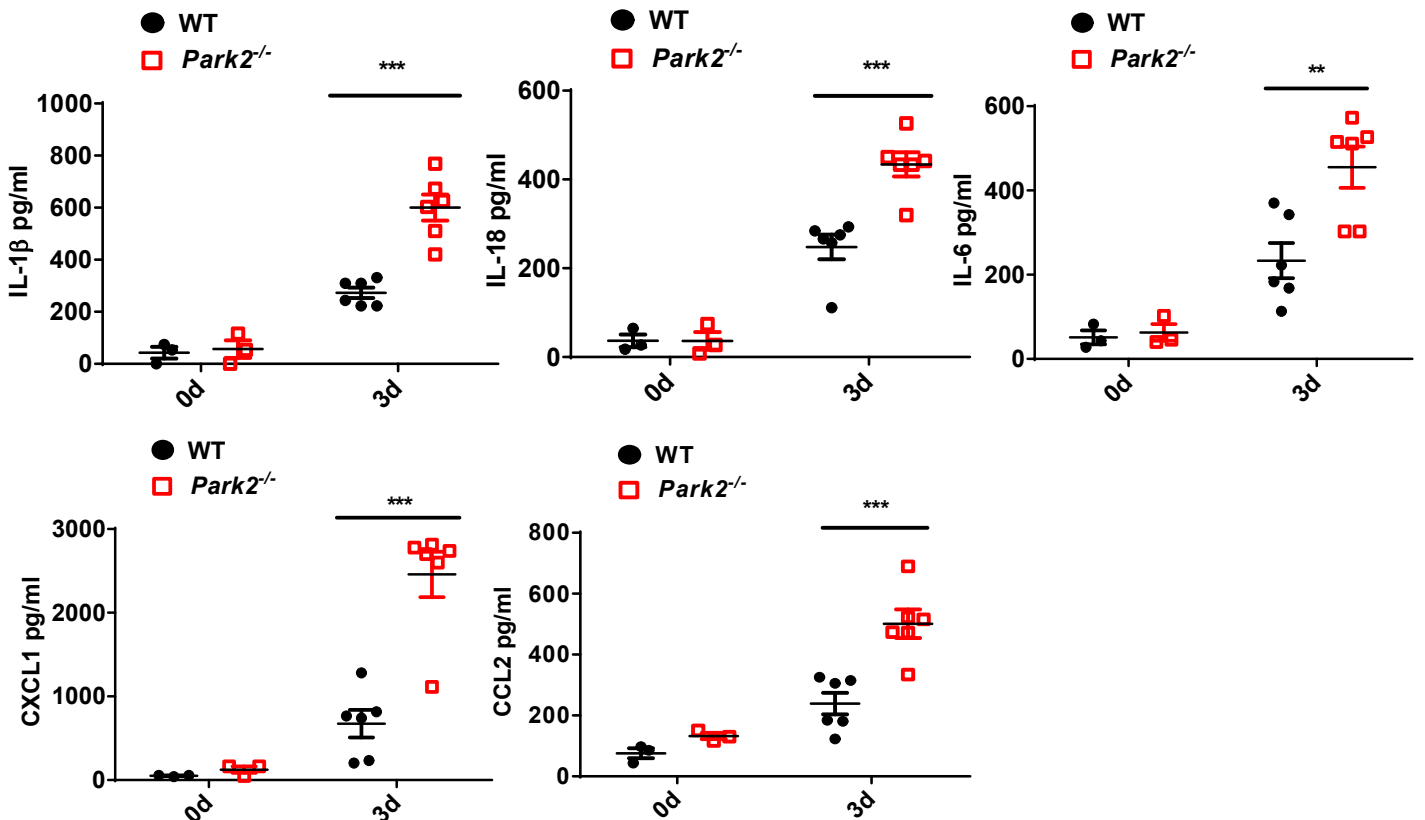

**Figure S3. Parkin deficiency enhances viral-induced expression of pro-inflammatory cytokines in lung, Related to Figure 2 and 3.**

(A) ELISA analysis of IL-1 $\beta$ , IL-18, IL-6, CXCL1 and CCL2 of lungs from WT and *Park2*<sup>-/-</sup> mice infected with VSV for 3 days (n=6 for viral infection, n=3 for mock infection).

(B) ELISA analysis of IL-1 $\beta$ , IL-18, IL-6, CXCL1, CCL2 of lungs from WT and *Park2*<sup>-/-</sup> mice infected with HSV-1 for 3 days (n=6 for viral infection, n=3 for mock infection).

Data are pooled from three independent experiments. Error bars show means  $\pm$  SEM. \* \*  $P < 0.01$ , \* \* \*  $P < 0.001$ . Two-way ANOVA with Sidak's multiple comparisons test.

Figure S4

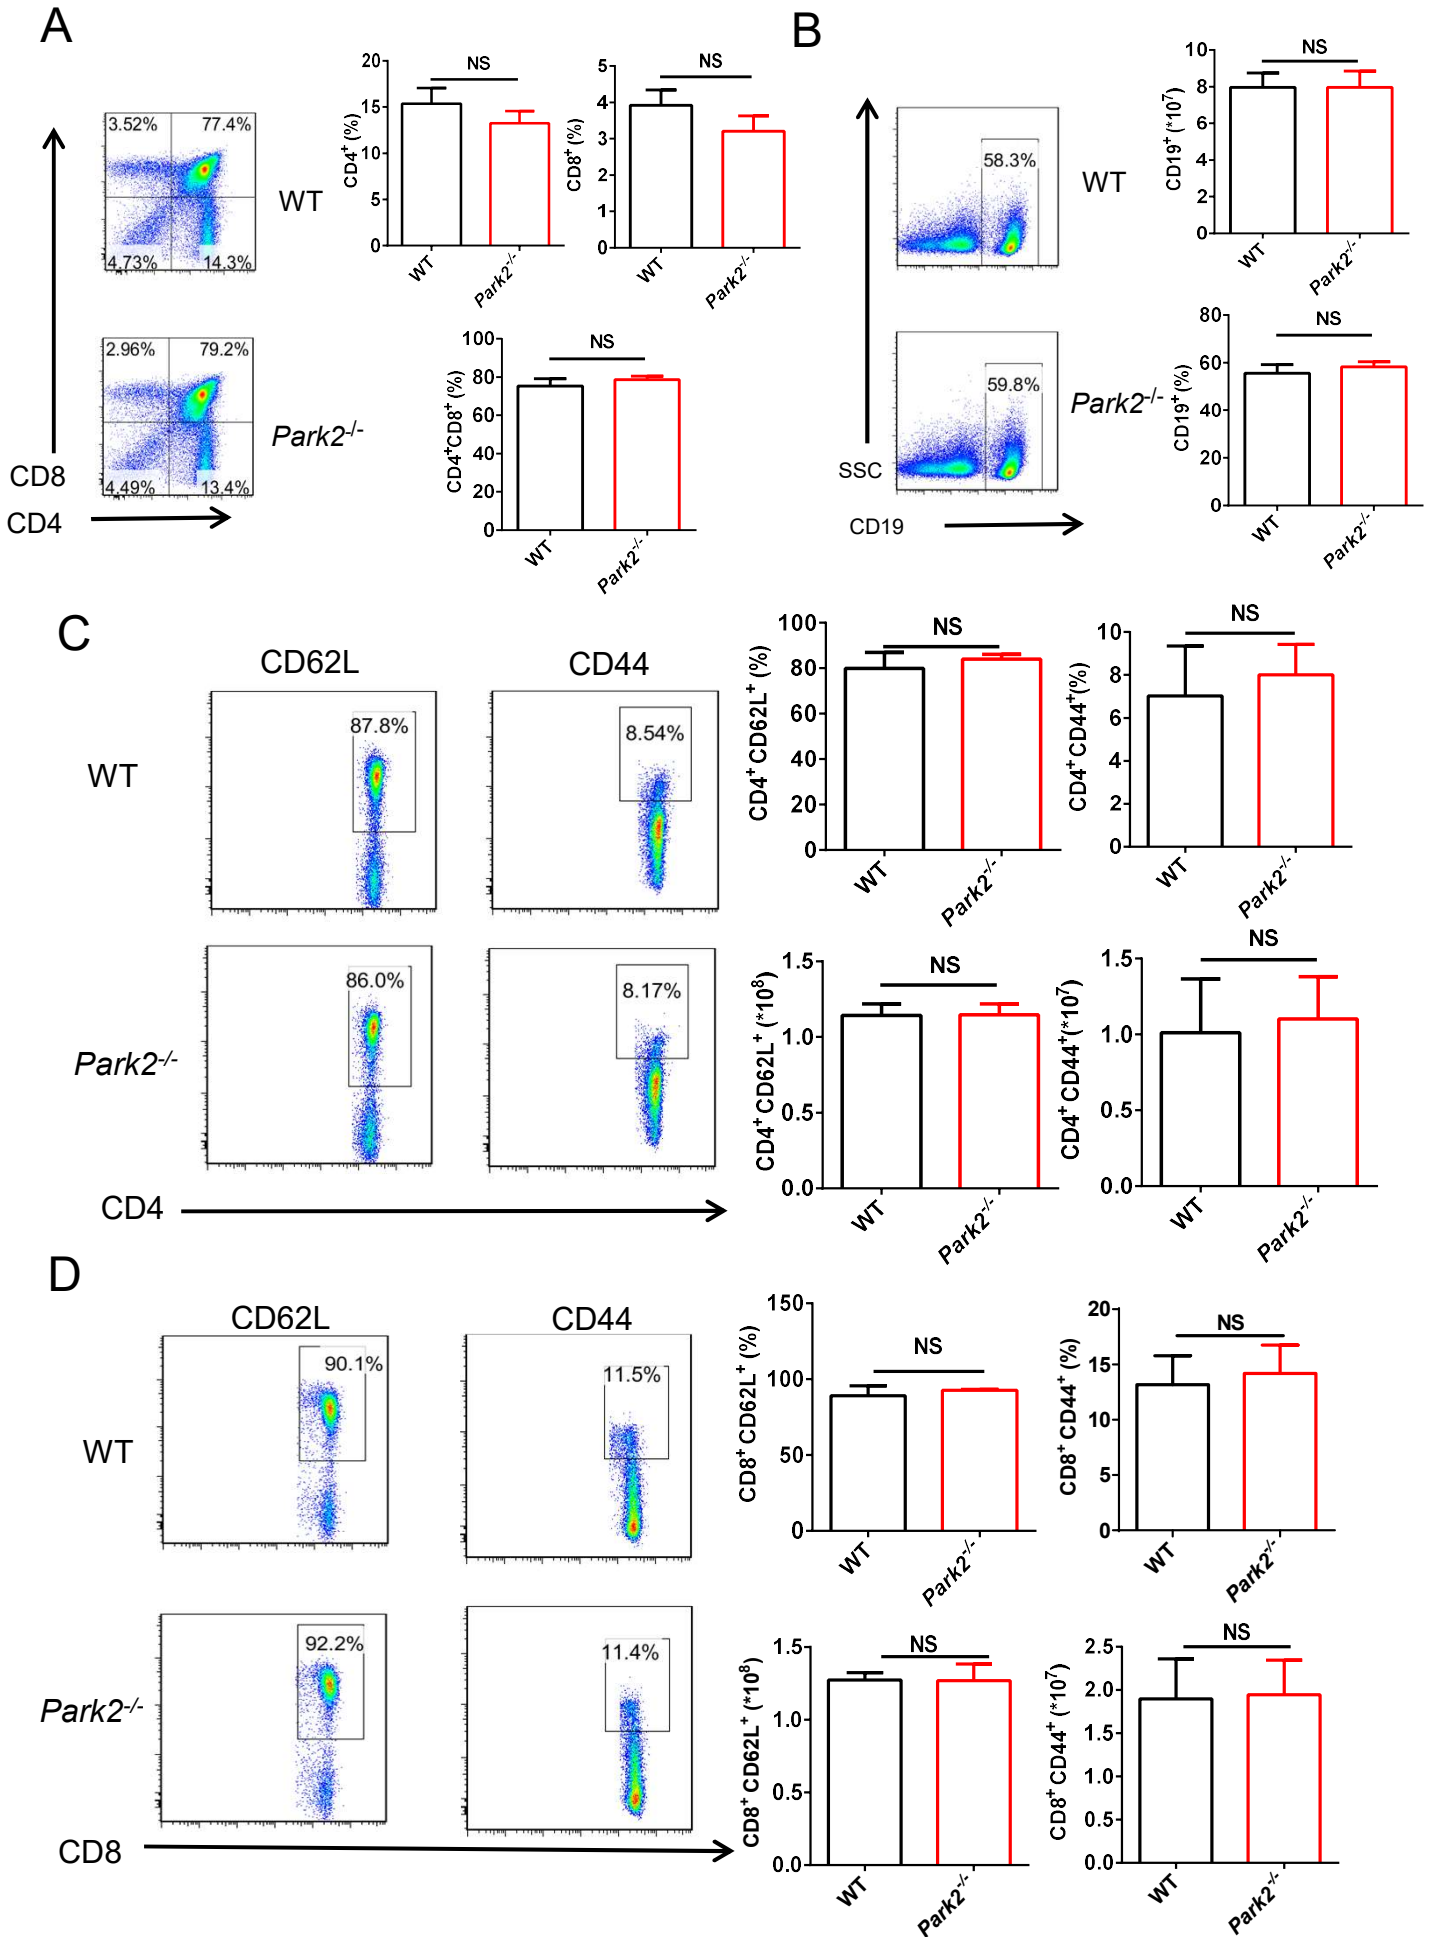

**Figure S4. Parkin deficiency doesn't affect lymphoid cells, Related to Figure 2 and 3.**

Flow cytometry analysis of percentages and numbers of lymphoid cells in thymus and spleen of WT or *Parkin*<sup>-/-</sup> mice at 10 weeks of age.

(A) CD4<sup>+</sup>, CD8<sup>+</sup> and CD4<sup>+</sup>CD8<sup>+</sup> T cells in thymus.

(B) CD19<sup>+</sup> B cells in spleen.

(C) CD4<sup>+</sup> CD44<sup>+</sup> and CD4<sup>+</sup> CD62l<sup>+</sup> T cells in spleen.

(D) CD8<sup>+</sup> CD44<sup>+</sup> and CD8<sup>+</sup> CD62l<sup>+</sup> T in spleen.

N=3. Error bars show means  $\pm$  SEM. NS, not significant. Unpaired t test.

Figure S5

A

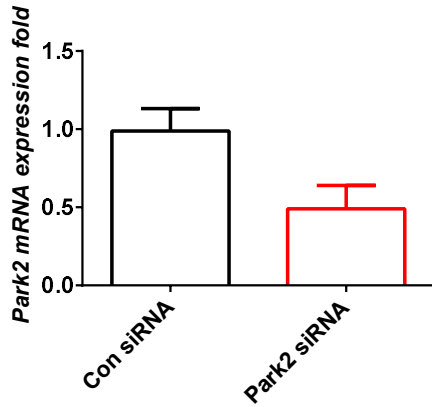

B

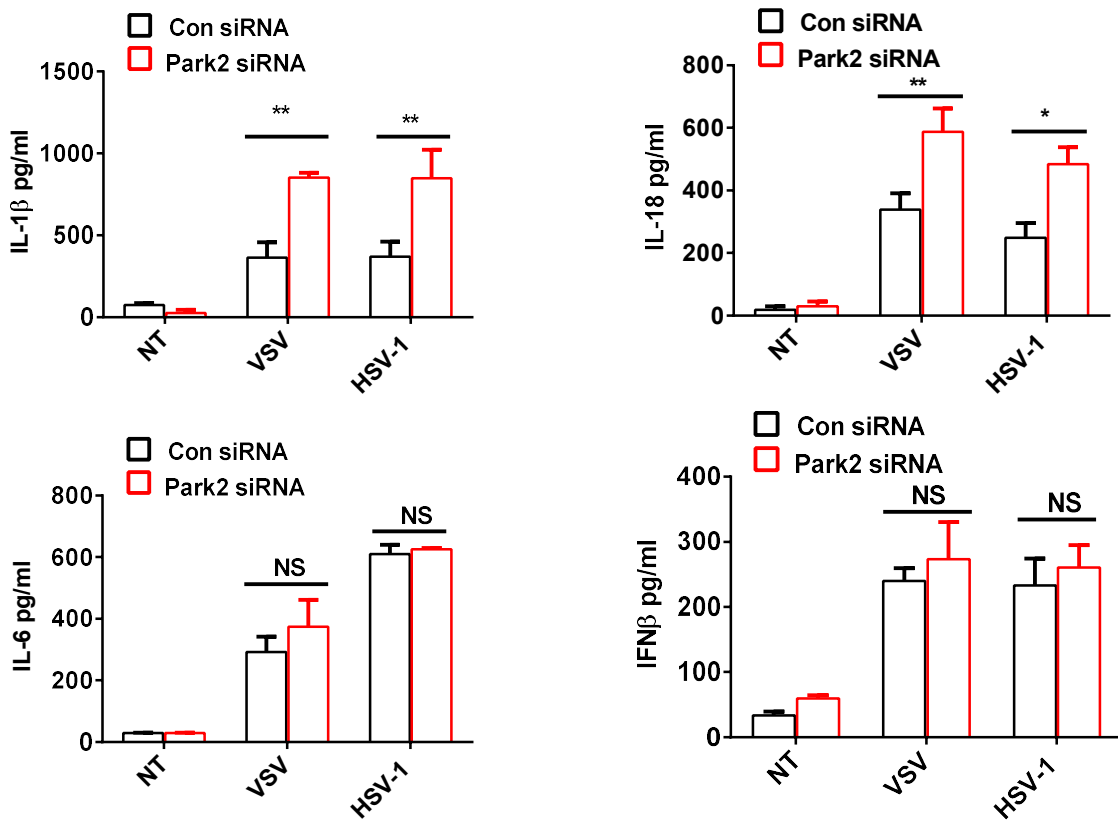

**Figure S5. Parkin knockdown in THP1 cells doesn't affect IFN production but increases the production of inflammasome-related cytokines in response to viral infection, Related to Figure 4.**

(A) RT-qPCR analysis of *Park2* mRNA of THP1 cells transfected with control scramble or Park2-specific siRNA for 48h.

(B) ELISA analysis of IL-1 $\beta$ , IL-18, IL-6 and IFN- $\beta$  in the supernatants of THP1 cells transfected with control scramble or Parkin-specific siRNA for 48h and then infected with VSV at MOI 1 or HSV-1 at MOI 2 for 24h.

Data are pooled from three independent experiments. Error bars show means  $\pm$  SEM. \*  $P < 0.05$ , \*\*  $P < 0.01$ , NS, not significant. Two-way ANOVA with Sidak's multiple comparisons test.

Figure S6

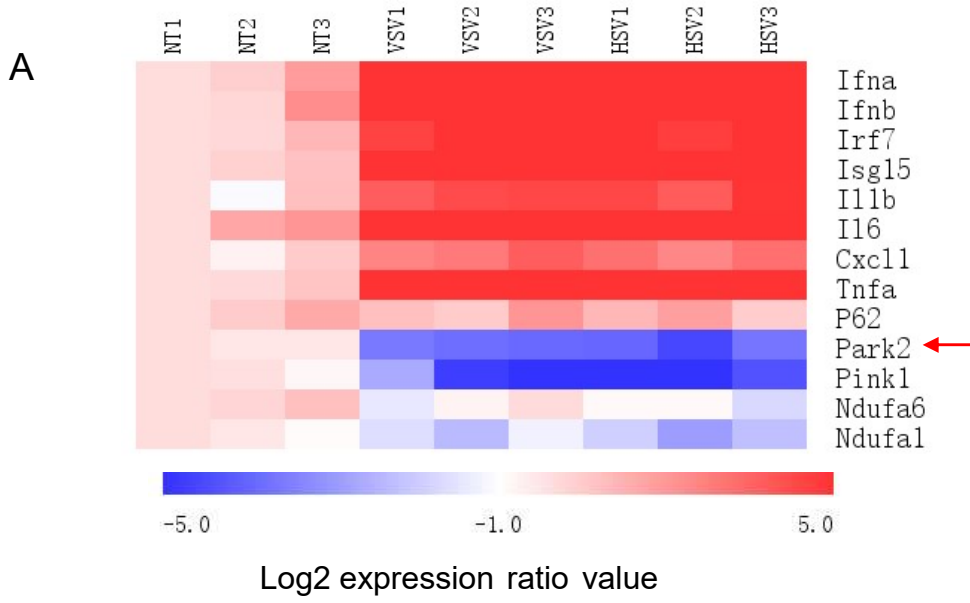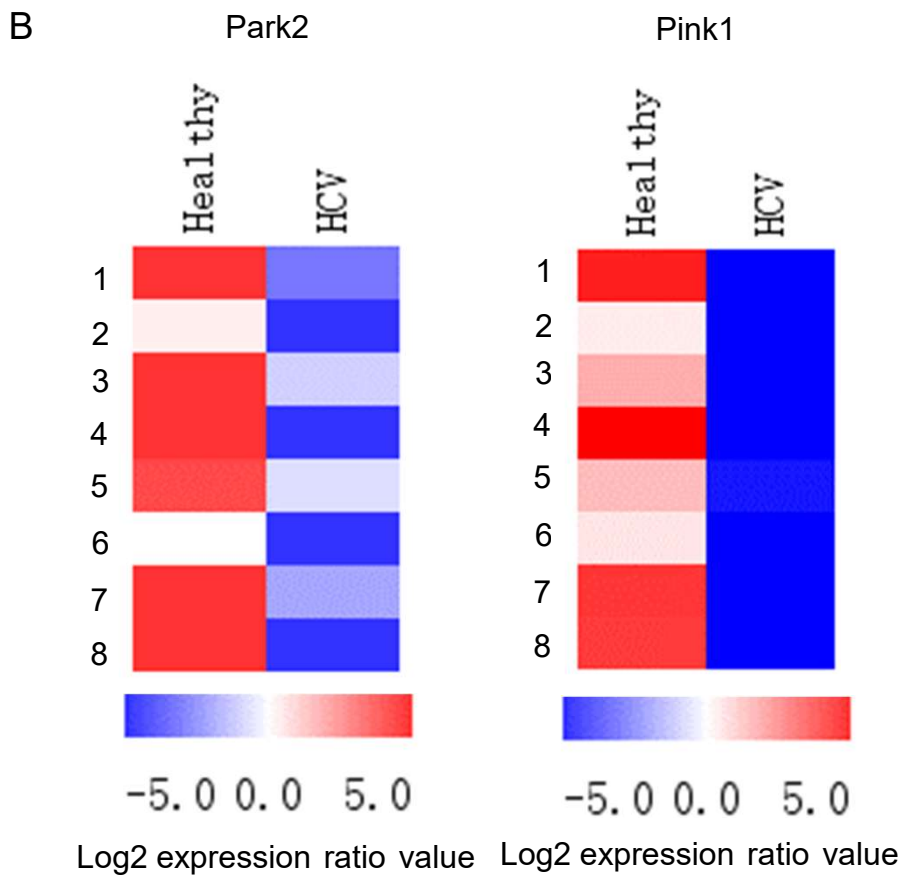



**Figure S6. Parkin gene decrease in response to virus infection in BMDMs and PBMCs of patients, Related to Figure 1.**

(A) Heatmap visualization of gene expression for *Park2*, *Pink1*, *P62*, *Irf7*, *Isg15*, *Ifnb*, *Ifna*, *Il1b*, *Il6*, *Cxcl1*, *Tnfa*, *Ndufab1* and *Ndufa6* in BMDMs infected with VSV or HSV-1 for 6h determined by qPCR (log<sub>2</sub> fold values). The abundance of each mRNA was normalized relative to PCR of the housekeeping gene *hprt*.

(B) RT-qPCR analysis of *Park2* and *Pink1* mRNA expression of PBMCs from healthy and HCV patients (log<sub>2</sub> fold values).

Figure S7

A

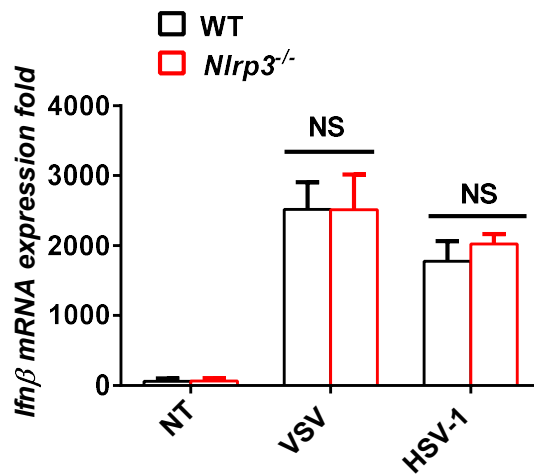

B

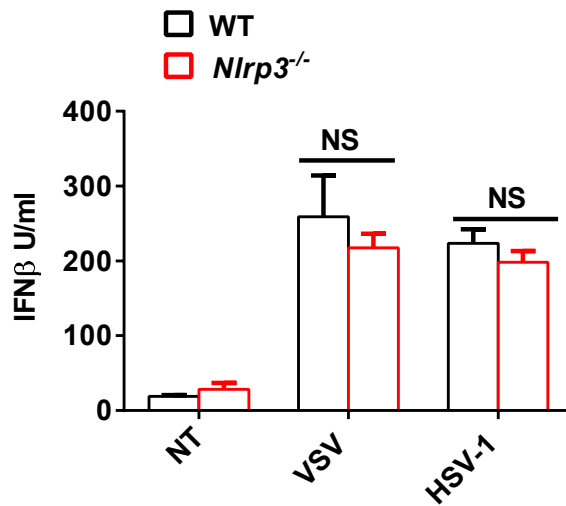

**Figure S7. NLRP3 deficiency in BMDMs doesn't affect IFN production in response to viral infection, Related to Figure 6.**

(A) RT-qPCR analysis of *Ifnb* mRNA of WT and *Nlrp3*<sup>-/-</sup> BMDCs infected with VSV or HSV-1 at MOI 1 for 12h.

(B) ELISA of IFN- $\beta$  in the supernatants of WT and *Nlrp3*<sup>-/-</sup> BMDCs infected with VSV or HSV-1 at MOI 1 for 24h.

Data are pooled from three independent experiments. Error bars show means  $\pm$  SEM. NS, not significant. two-way ANOVA with Sidak's multiple comparisons test.

## Figure S8

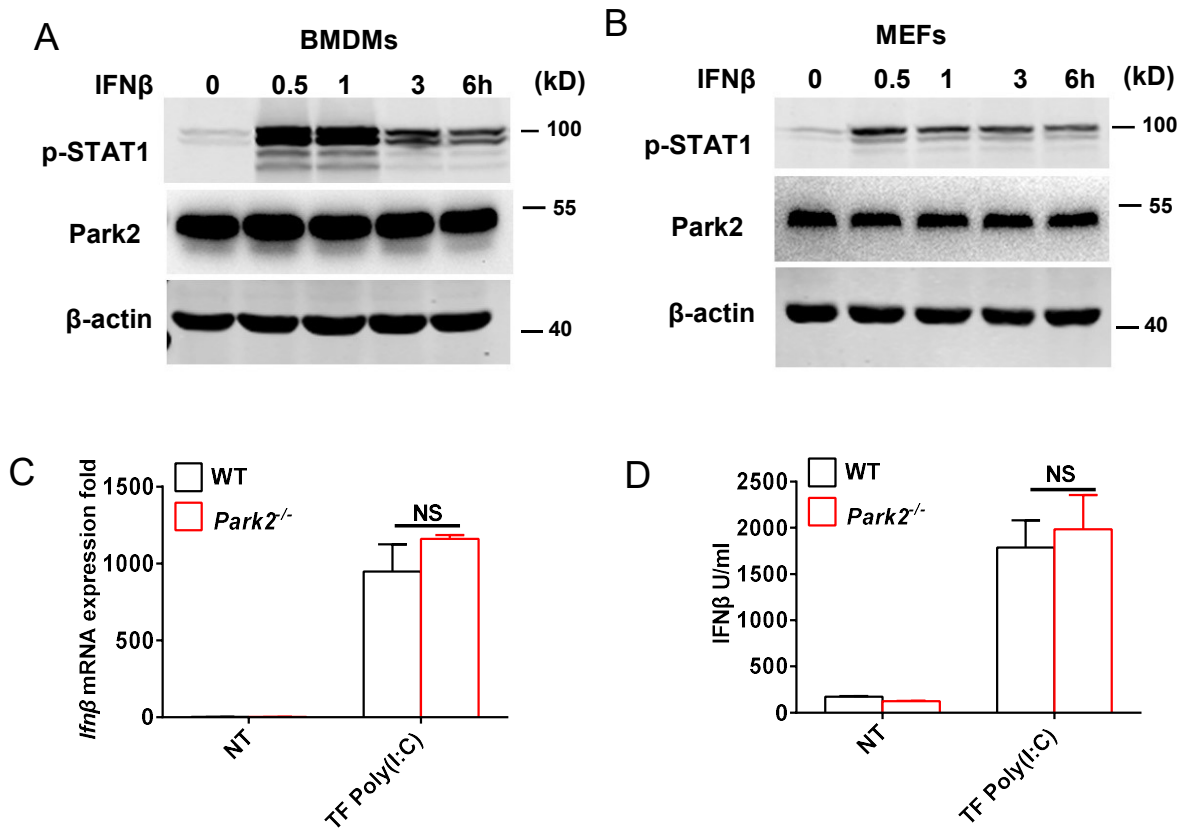

**Figure S8. The independent role of type I IFNs in regulating Parkin expression in response to virus infection, and IFN production in response to RLR non replicative IFN inducer, Related to Figure 1.**

(A) Immunoblot analysis of phosphorylated (p-) STAT1, Park2 and  $\beta$ -actin (loading control) in WT BMDMs treated with IFN $\beta$  (500U/ml) for 0,0.5, 1, 3 and 6h.

(B) Immunoblot analysis of phosphorylated (p-) STAT1, Park2 and  $\beta$ -actin (loading control) in WT MEFs treated with IFN $\beta$  (500U/ml)for 0,0.5, 1, 3 and 6h.

(C) RT-qPCR analysis of *Ifnb* mRNA expression of WT and *Park2*<sup>-/-</sup> MEFs transfected with Poly(I:C) (10ug/ml) for 6h. NT, No treatment. TF: Transfect.

(D) ELISA analysis of IFN- $\beta$  protein expression of WT and *Park2*<sup>-/-</sup> MEFs transfected with Poly(I:C) (10ug/ml) for 18h. NT, No treatment. TF: Transfect.

Data are pooled from three independent experiments. Error bars show means  $\pm$  SEM. NS, not significant. Two-way ANOVA with Sidak's multiple comparisons test.
